# Supplementary material for: Ultralow platinum catalysts for high performance fuel cells: in situ encapsulation of platinum atoms and CoPt3 in 3D hollow nanoshells
Source: Royal Society of Chemistry journal article supplement (doi:10.1039/d3ta04001a), 2023-01-01
Supplement: d3ta04001a1.pdf [file d3ta04001a1.pdf]

Ultralow Platinum Catalysts for High Performance Fuel Cells: *in Situ* Encapsulation  
of platinum atoms and CoPt<sub>3</sub> into 3D hollow nanoshells

*Jingjing Zhang, Pingwen Ming, Bing Li\*, Cunman Zhang*

Clean Energy Automotive Engineering Center and School of Automotive Studies,  
Tongji University, Shanghai 201804, China

\* Corresponding author.

E-mail addresses: libing210@tongji.edu.cn (B. Li)

## **1. Experimental Section**

### **1.1 Chemical and Electrocatalyst preparation**

Analytical grade cobalt nitrate hexahydrate ( $\text{Co}(\text{NO}_3)_2 \cdot 6\text{H}_2\text{O}$ ), Methanol, Ethanol were obtained from Sinopharm Chemical Reagents, China. 2-Methylimidazole was obtained from Aladdin Reagents Ltd.  $\text{NaBH}_4$  was obtained from Sinopharm Chemical Reagents, China.  $\text{PtCl}_2$  was obtained from Shanghai Macklin Biochemical Ltd. The commercial Pt/C (20%) catalyst was purchased from Johnson Matthey. Nafion (5wt%) was acquired from Sigma-Aldrich. All of the chemicals used in this experiment were analytical grade and used without further purification.

### **1.2 Synthesis of ZIF-67**

2-methylimidazole (2.5 g) and  $\text{Co}(\text{NO}_3)_2 \cdot 6\text{H}_2\text{O}$  (1 g) were dissolved in 50 mL methanol respectively to form two solutions, and stirred them vigorously for five minutes at room temperature to obtain homogeneous solutions. Then, the first solution was added into the second solution under stirring, and the final mixture was stirred constantly at 25 °C for 1 h and stationary for 12 h to form ZIF-67. The obtained product was collected by centrifugation and washed ethanol for three times, which disperse in ethanol and waited for use.

### **1.3 Synthesis of Co@NC**

The as-prepared ZIF-67 was pyrolyzed under an  $\text{H}_2$ &Ar ( $\text{H}_2$  5%) atmosphere in a tube furnace. The samples were calcined at 350 °C (1.5 h) with a rate of 2 °C  $\text{min}^{-1}$ , furthermore, further, the samples were calcined at 700 °C with a rate of 2 °C  $\text{min}^{-1}$  and maintained at 700 °C for 3.5 h. Then naturally cooling to room temperature.

### **1.4 Synthesis of $\text{PtCl}_2$ @ZIF-67**

20 mL PtCl<sub>2</sub> solution (1 mg/mL) was added to a fresh dispersion of ZIF-67. After agitated stirring at room temperature for 1 h, 3 mL NaHB<sub>4</sub> (1 mg/mL) was added dropwise under stirring. the as-obtained products were centrifuged, and finally freeze-dried for overnight.

### **1.5 Preparation of Pt SAs/CoPt<sub>3</sub>@NC**

The as prepared PtCl<sub>2</sub>@ZIF-67 was pyrolyzing under an H<sub>2</sub>/Ar (H<sub>2</sub> 5%) atmosphere in a tube furnace. The sample was heated to 350 °C (1.5 h) with a rate of 2 °C min<sup>-1</sup>, further, the samples were calcined at 700 °C with a rate of 2 °C min<sup>-1</sup> and maintained at 700 °C for 3.5 h. Then naturally cooling to room temperature.

### **1.6 Materials characterization**

The morphologies of catalysts and the changes after the durability test were analyzed by transmission electron microscopy (TEM). The crystallinity of the Pt SAs/CoPt<sub>3</sub>@NC and Co@NC-700 catalysts were determined by X-ray diffraction (XRD). Raman spectroscopy was employed to measure the graphitization degrees in carbon materials and analyze their structural changes. The bulk compositions of Pt SAs/CoPt<sub>3</sub>@NC catalysts were characterized by inductively coupled plasma mass spectrometry (ICP-MS). Scanning electron microscopy (SEM) was employed to analyze the sample shape of Pt SAs/CoPt<sub>3</sub>@NC. The specific surface areas and pore size distributions of carbon supports were obtained by Brunauer-Emmett-Teller (BET) analysis with high-purity N<sub>2</sub> as filling gas after degassing at 200 °C for 8 h.

### **1.7 Fabrication of MEAs**

The slurry was prepared by dispersing catalyst and 5% Nafion solution into water and

isopropanol (volume ratio of 1:1). This slurry was sprayed onto a membrane of 25 cm<sup>2</sup> (GORE, thickness of 10 μm), and then the gas diffusion layers (25BC, SGL) were fixed to both sides of the as-sprayed membrane to produce MEAs. The MEAs were fabricated using the Pt SAs/CoPt<sub>3</sub>/NC catalysts and the commercial 20wt% Pt/C(JM) catalyst in the cathode and anode, respectively, and two controls were obtained using Pt SAs/CoPt<sub>3</sub>/NC in the cathode and only Pt/C (JM) in both electrodes. The Pt loadings of the cathode and anode in all of the MEAs are 0.03 and 0.015 mgPt cm<sup>-2</sup>.

### **1.8 Electrochemical Evaluation**

The electrochemical tests of supports and catalysts were conducted by a rotating disc electrode (RDE) technique. The catalyst of 2 mg was added to a Nafion/ethanol solution of 1 mL (the mass ratio of Nafion solution/ethanol is 1:30) to obtain the catalyst ink. Cyclic voltammetry (CV), linear sweep voltammetry (LSV), and 30000 cycles of durability testing (in 0.1M HClO<sub>4</sub> solution) were employed to estimate electrochemical activity and durability of catalysts.

### **1.9 Single-Cell and High Potential Durability Tests of MEAs**

All MEAs performed the same single-cell tests. The operating conditions of polarization curves was as follows: the cell temperature, relative humidity (RH), back pressure (relative to the atmosphere), and H<sub>2</sub>/air stoichiometric ratio (excess coefficient) are 80 °C, 80%, 120 kPa, and 1.7:3.0, respectively. The operating conditions of the durability test were as follows: the cell temperature and RH were 80 °C and 100%, respectively, and the cathode and anode were supplied with N<sub>2</sub> and H<sub>2</sub> of 0.2 NLPM.

## 2.0 Pt SAs@NC

2-methylimidazole (2.5 g) and  $\text{Zn}(\text{NO}_3)_2 \cdot 6\text{H}_2\text{O}$  (1 g) were dissolved in 50 mL methanol respectively to form two solutions, and stirred them vigorously for five minutes at room temperature to obtain homogeneous solutions. Then, the first solution was added into the second solution under stirring, and the final mixture was stirred constantly at 25 °C for 1 h and stationary for 12 h to form ZIF-8, the obtained product was collected by centrifugation. 20 mL  $\text{PtCl}_2$  solution (1 mg/mL) was added to a fresh dispersion of ZIF-8. After agitated stirring at room temperature for 1 h, 3 mL  $\text{NaHB}_4$  (1 mg/mL) was added dropwise under stirring. the as-obtained products were centrifuged, and finally freeze-dried for overnight ( $\text{PtCl}_2@\text{ZIF-8}$ ). The as prepared  $\text{PtCl}_2@\text{ZIF-8}$  was pyrolyzing under an  $\text{N}_2$  atmosphere in a tube furnace. The samples were calcined at 910 °C with a rate of 2 °C  $\text{min}^{-1}$  and maintained at 910 °C for 3.5 h. Then naturally cooling to room temperature. According to Figure 3, we have successfully synthesized single-atom Pt.

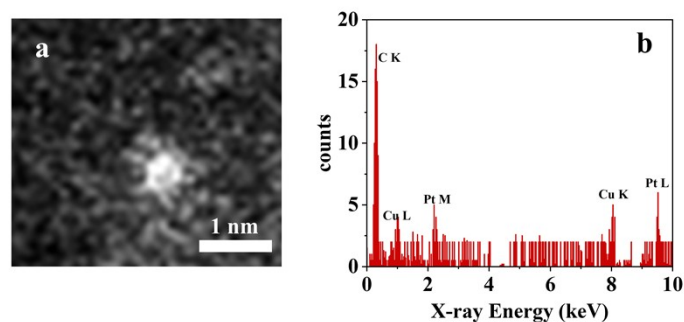

Figure S1. Pt SAs@NC catalyst. a) HAADF-STEM images. b) EDXS spectrum.

## 2.1 Pt<sub>3</sub>Co@ NC

Synthesis of Pt<sub>3</sub>Co according to previous literature method<sup>1</sup>, The obtained Pt<sub>3</sub>Co for the next-stage usage.

ZIF-8 samples were calcined at 910 °C with a rate of 2 °C  $\text{min}^{-1}$  and maintained at 910 °C for 3.5 h. Then naturally cooling to room temperature. NC (20 mg) was ultrasonically dispersed in 15 mL of isopropanol for 1 hour, followed by the addition of 10 mL of cyclohexane containing Pt<sub>3</sub>Co nanoparticles, and then ultrasonicated for another 0.5 hours. The as-prepared slurry was subjected to centrifugation at 10000 rpm for 5 min and dried in a vacuum oven at 70 °C for 2 hours to obtain the Pt<sub>3</sub>Co@ NC

catalyst. According to Figure S2, we have successfully synthesized the active species  $\text{CoPt}_3$ .

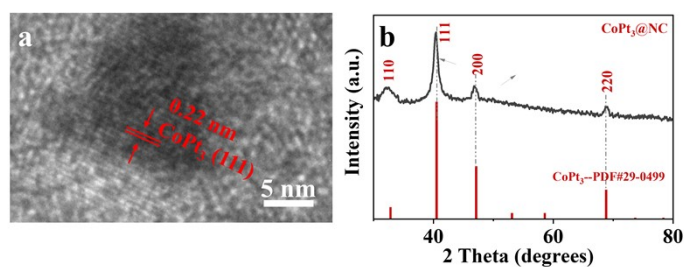

Figure S2.  $\text{CoPt}_3@NC$  catalyst. a) HRTEM images. b) XRD spectrum.

## 2.2 $\text{Co}@NC$

2-methylimidazole (2.5 g) and  $\text{Co}(\text{NO}_3)_2 \cdot 6\text{H}_2\text{O}$  (1 g) were dissolved in 50 mL methanol respectively to form two solutions, and stirred them vigorously for five minutes at room temperature to obtain homogeneous solutions. Then, the first solution was added into the second solution under stirring, and the final mixture was stirred constantly at  $25\text{ }^\circ\text{C}$  for 1 h and stationary for 12 h to form ZIF-67. The obtained product was collected by centrifugation. The as-prepared ZIF-67 was pyrolyzed under an  $\text{H}_2\&\text{Ar}$  ( $\text{H}_2$  5%) atmosphere in a tube furnace. The samples were calcined at  $350\text{ }^\circ\text{C}$  (1.5 h) with a rate of  $2\text{ }^\circ\text{C min}^{-1}$ , furthermore, further, the samples were calcined at  $700\text{ }^\circ\text{C}$  with a rate of  $2\text{ }^\circ\text{C min}^{-1}$  and maintained at  $700\text{ }^\circ\text{C}$  for 3.5 h. Then naturally cooling to room temperature. According to Figure S3, we have successfully synthesized cobalt nanoparticles.

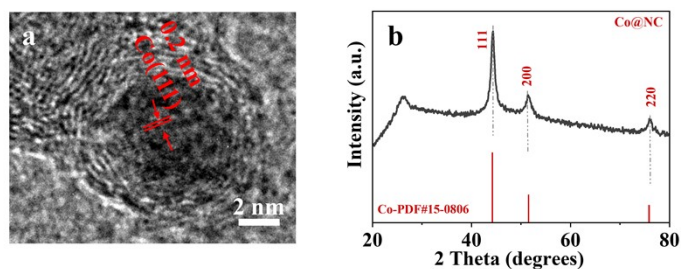

Figure S3.  $\text{Co}@NC$  catalyst. a) HRTEM images. b) XRD spectrum.

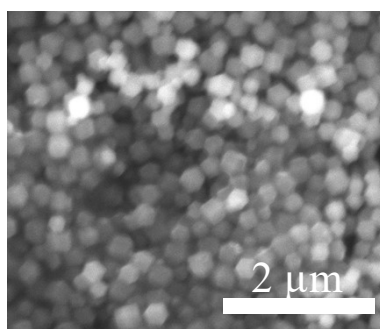

**Figure S4.** SEM of ZIF-67.

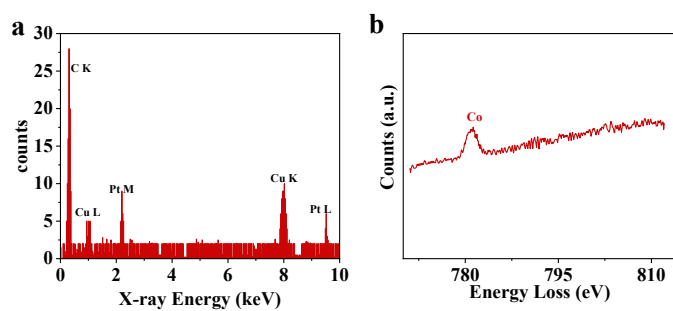

**Figure S5.** a) EDXS spectrum. b) EELS spectrum.

**Table S1.** the ICP-MS analysis for Pt element in Pt SAs/CoPt<sub>3</sub>@NC.

| element | ICP-MS (wt%) |
|---------|--------------|
| Pt      | 3.2          |

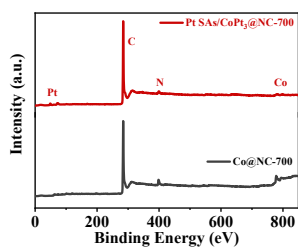

**Figure S6.** The XPS spectra of Pt SAs/CoPt<sub>3</sub>@NC-700 and Co@NC-700 catalysts.

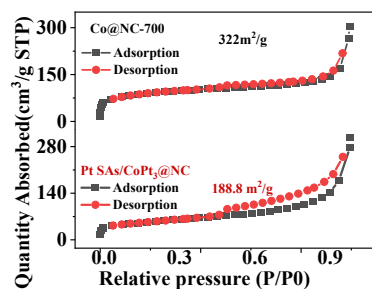

**Figure S7.**  $N_2$  adsorption–desorption isotherms of the Pt SAs/ $CoPt_3@NC$  and  $Co@NC$  catalysts.

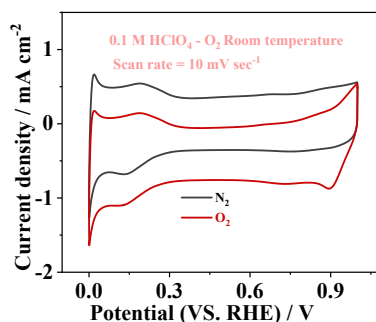

**Figure S8.** CV profiles of Pt SAs/ $CoPt_3@NC-700$  catalyst (black and red curves indicate CV curves recorded in  $N_2$ - and  $O_2$ -saturated 0.1 M  $HClO_4$  solution, respectively).

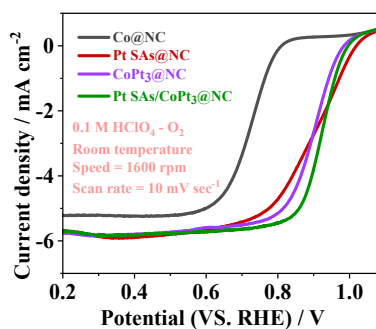

**Figure S9.** Positive-going ORR polarization curves of  $Co@NC$ ,  $Pt\ SAs@NC$ ,  $CoPt_3@NC$ , and  $Pt\ SAs/CoPt_3@NC$  catalysts in  $O_2$ -saturated 0.1 M  $HClO_4$  solution.



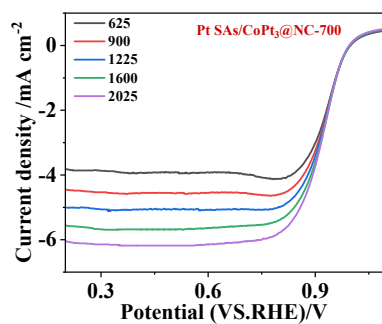

Figure S10. Koutecky–Levich plots of the Pt SAs/CoPt<sub>3</sub>@NC.

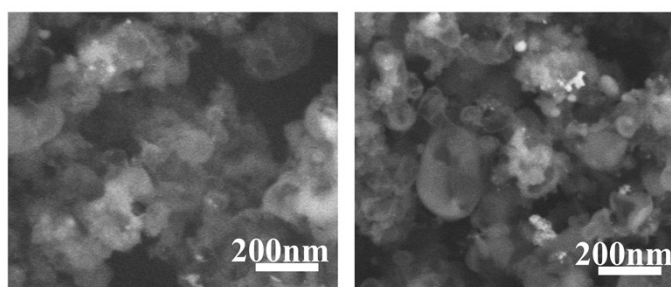

Figure S11. a, b) SEM images of Pt SAs/CoPt<sub>3</sub>@NC-700 before and after 30000 cycles.

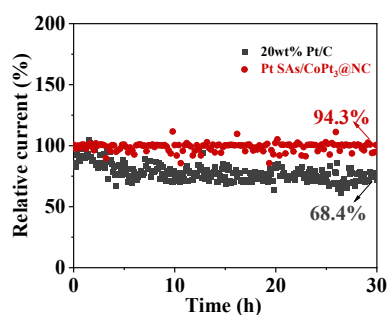

Figure S12. Long-term i-t test performed of Pt SAs/CoPt<sub>3</sub>@NC-700 and 20wt% Pt/C in 0.1 M HClO<sub>4</sub>.

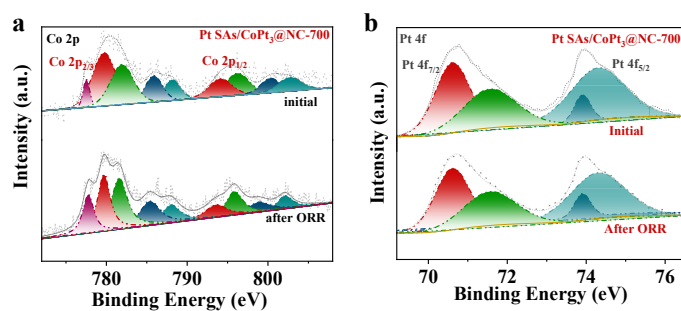

Figure S13. (a) Co 2p and (b) Pt 4f spectrums of Pt SAs/CoPt<sub>3</sub>@NC-700 before and after ORR stability test.

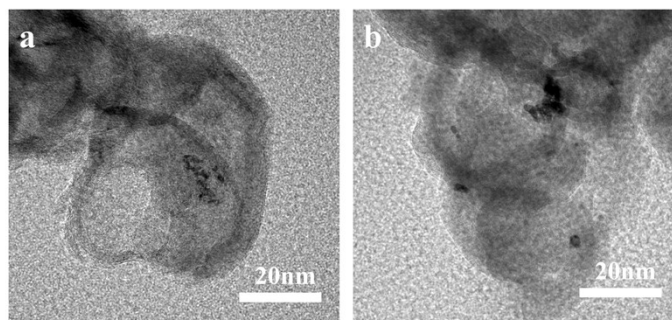

**Figure S14.** a, b) TEM images of Pt SAs/CoPt<sub>3</sub>@NC-700 before and after 30000 cycles.

**Table S2.** Comparison of the ORR activity of Pt SAs/CoPt<sub>3</sub>@NC with various recently reported Pt-based catalysts and advanced catalysts.

| Catalysts                                  | electrolyte             | Half-wave potential (V vs. RHE) | Pt loading (ugPt cm <sup>-2</sup> ) | References |
|--------------------------------------------|-------------------------|---------------------------------|-------------------------------------|------------|
| Pt SAs/CoPt <sub>3</sub> @NC               | 0.1 M HClO <sub>4</sub> | 0.928                           | 13                                  | This work  |
| Pt/C                                       | 0.1 M HClO <sub>4</sub> | 0.908                           | 51                                  | This work  |
| PtCo <sub>3</sub> -H600                    | 0.1 M HClO <sub>4</sub> | 0.905                           | 12                                  | 2          |
| Pt/CNTs                                    | 0.1 M HClO <sub>4</sub> | 0.85                            | 20                                  | 3          |
| PtBi/C                                     | 0.1 M HClO <sub>4</sub> | 0.886                           | 10                                  | 4          |
| PtA@FeSA-N-C                               | 0.1 M HClO <sub>4</sub> | 0.923                           | 13                                  | 5          |
| PtFe/C                                     | 0.1 M HClO <sub>4</sub> | 0.893                           | 19.99                               | 6          |
| Pt/40Co-NC-900                             | 0.1 M HClO <sub>4</sub> | 0.92                            | 60                                  | 7          |
| PtCu NSs/C,                                | 0.1 M HClO <sub>4</sub> | 0.893                           | 18.9                                | 8          |
| PtFe-Fe <sub>2</sub> C                     | 0.1 M HClO <sub>4</sub> | 0.91                            | 26.52                               | 9          |
| Pd@PtCu                                    | 0.1 M HClO <sub>4</sub> | 0.89                            | 15                                  | 10         |
| Pt@Co SAs-ZIF-NC                           | 0.1 M HClO <sub>4</sub> | 0.917                           | 25.5                                | 12         |
| PtDs/gdsDNA/rGO                            | 0.1 M HClO <sub>4</sub> | 0.9                             | 14.14                               | 13         |
| Co <sub>1.08</sub> Fe <sub>3.34</sub> @NGT | 0.1 M HClO <sub>4</sub> | ≈0.8                            | \                                   | 14         |
| Pt <sub>n</sub> /gDNA-GO                   | 0.1 M HClO <sub>4</sub> | 0.9                             | 11.31                               | 15         |

Table S3. Pt 4f peak position and proportion (%) of Pt<sup>0</sup> and Pt<sup>δ+</sup> in Pt SAs/CoPt<sub>3</sub>@NC.

| Pt SAs/CoPt <sub>3</sub> @NC |     |               |                 |
|------------------------------|-----|---------------|-----------------|
| Pt <sup>0</sup> 4f(eV)       | 7/2 | 70.6          | 18.9%           |
|                              | 5/2 | /             |                 |
| Pt <sup>δ+</sup> 4f(eV)      | 7/2 | 71.3          | 21.1%           |
|                              | 5/2 | 74.1 and 74.6 | 27.0% and 32.8% |

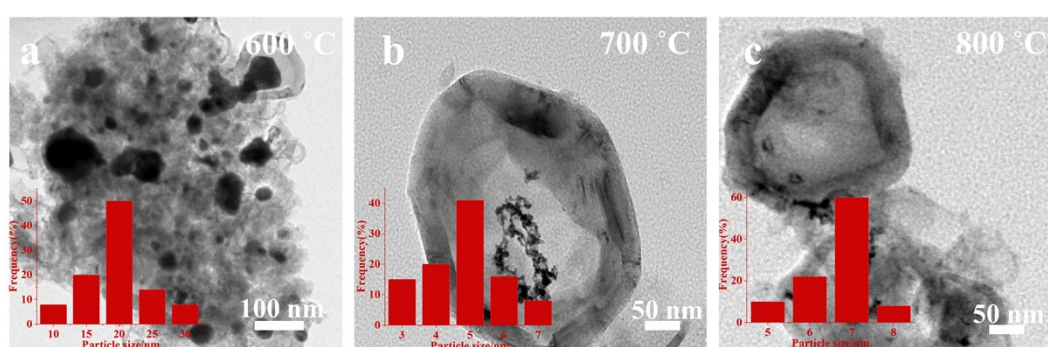

**Figure S15.** TEM image and particle size distribution image. a) Pt SAs/CoPt<sub>3</sub>@NC-600; b) Pt SAs/CoPt<sub>3</sub>@NC-700 and c) Pt SAs/CoPt<sub>3</sub>@NC-800.

## Reference

- [1] W. C. Xu, Z. P. Zhu, Y. C. Wang, P. X. Cui, L. Tong, K. G. Zhao, J. Y. Yuan, Z. Y. Zhou, H. W. Liang, N. Tian, S. G. Sun, Nitrogen doping to accelerate the phase transition to ordered intermetallic Pt<sub>3</sub>Co catalyst for the oxygen reduction reaction in fuel cells, *J. Mater. Chem. A*, 11(2023), 4078-4087.
- [2] Z. Wang, X. Yao, Y. Kang, L. Miao, D. Xia, L. Gan, structurally ordered low-Pt intermetallic electrocatalysts toward durably high oxygen reduction reaction activity, *Adv. Funct. Mater.* 29 (2019) 1-9.
- [3] X. Tong, J. Zhang, G. Zhang, Q. Wei, R. Chenitz, J.P. Claverie, S. Sun, Ultrathin carbon-coated Pt/carbon nanotubes: A highly durable electrocatalyst for oxygen reduction, *Chem. Mater.* 29 (2017) 9579-9587.
- [4] Y. Qin, M. Luo, Y. Sun, C. Li, B. Huang, Y. Yang, Y. Li, L. Wang, S. Guo, Intermetallic hcp-PtBi/fcc-Pt core/shell nanoplates enable efficient bifunctional oxygen reduction and methanol oxidation electrocatalysis, *ACS Catal.* 8 (2018) 5581-5590.
- [5] X. Ao, W. Zhang, B. Zhao, Y. Ding, G. Nam, L. Soule, A. Abdelhafiz, C. Wang, M. Liu, atomically dispersed Fe-N-C decorated with Pt-alloy core-shell nanoparticles for improved activity and durability towards oxygen reduction, *Energy Environ. Sci.* 13 (2020) 3032-3040.
- [6] X. X. Du, Y. He, X. X. Wang, J. N. Wang, Fine-grained and fully ordered intermetallic PtFe catalysts with largely enhanced catalytic activity and durability, *Energy Environ. Sci.* 9 (2016) 2623-2632.

- [7] X. X. Wang, S. Hwang, Y. T. Pan, K. Chen, Y. He, S. Karakalos, H. Zhang, J. S. Spendelow, D. Su, G. Wu, Ordered Pt<sub>3</sub>Co Intermetallic Nanoparticles Derived from metal-organic frameworks for oxygen reduction, *Nano Lett.* 18 (2018) 4163-4171.
- [8] W. Li, Z.Y. Hu, Z. Zhang, P. Wei, J. Zhang, Z. Pu, J. Zhu, D. He, S. Mu, G. Van Tendeloo, Nano-single crystal coalesced PtCu nanospheres as robust bifunctional catalyst for hydrogen evolution and oxygen reduction reactions, *J. Catal.* 375 (2019) 164-170.
- [9] J. Lai, B. Huang, Y. Tang, F. Lin, P. Zhou, X. Chen, Y. Sun, F. Lv, S. Guo, Barrier-free interface electron transfer on PtFe-Fe<sub>2</sub>C Janus-like nanoparticles boosts oxygen catalysis, *Chem.* 4 (2018) 1153-1166.
- [10] M. Bao, I.S. Amiinu, T. Peng, W. Li, S. Liu, Z. Wang, Z. Pu, D. He, Y. Xiong, S. Mu, Surface evolution of PtCu alloy shell over Pd nanocrystals leads to superior hydrogen evolution and oxygen reduction reactions, *ACS Energy Lett.* 3 (2018) 940-945.
- [11] L. Liang, H. Jin, H. Zhou, B. Liu, C. Hu, D. Chen, Z. Wang, Z. Hu, Y. Zhao, H. Li, D. He, S. Mu, Cobalt single atom site isolated Pt nanoparticles for efficient ORR and HER in acid media, *Nano Energy.* 88 (2021) 2211-2855.
- [12] J. N. Tiwari, K. C. Kemp, K. Nath, R. N. Tiwari, H. Nam, K. S. Kim, Interconnected Pt-Nanodendrite/DNA/Reduced-Graphene-Oxide Hybrid Showing Remarkable Oxygen Reduction Activity and Stability, *ACS Nano.* 7(2013) 1936-0851.
- [13] S. Sultan, J. N. Tiwari, J. Jang, A. M. Harzandi, F. Salehnia, S. J. Yoo, K. S. Kim, Highly Efficient Oxygen Reduction Reaction Activity of Graphitic Tube Encapsulating

Nitrided CoxFey Alloy, *Adv. Energy Mater.* 8(2018) 1614-6832.

[14] J. N. Tiwari, K. Nath, S. Kumar, R. N. Tiwari, K. C. Kemp, N. H. Le1, D. H. Youn, J. S. Lee, K. S. Kim, Stable platinum nanoclusters on genomic DNA – graphene oxide with a high oxygen reduction reaction activity, *Nat. Commun.* 4(2013) 2041-1723.
